# Supplementary material for: Dual-responsive PU inverse photonic crystal film with high flexibility for anti-counterfeiting
Source: Royal Society of Chemistry journal article supplement (doi:10.1039/d3tc02444j), 2023-01-01
Supplement: d3tc02444j1.pdf [file d3tc02444j1.pdf]

## Supporting information

# Dual-Responsive PU Inverse Photonic Crystal Film with High Flexibility for Anti-counterfeiting

*Xin Zhang\**, Ziyuan Zhang, Fuchang Yu

Department of Chemistry and Chemical Engineering, Mianyang Normal University, Mianyang, 621000, China.

E-mail: [295199101@qq.com](mailto:295199101@qq.com), [zhangxin@mtc.edu.cn](mailto:zhangxin@mtc.edu.cn).

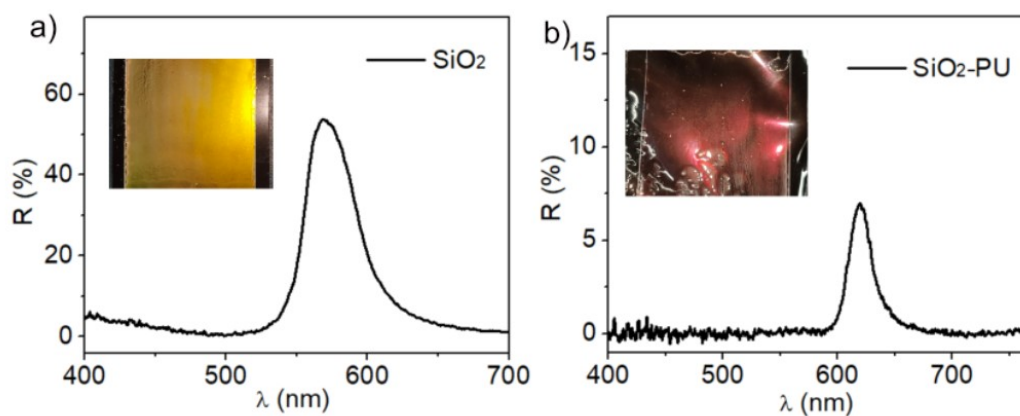

**Figure S1.** The reflection spectra and digital photos of a) SiO<sub>2</sub> photonic crystal film, b) SiO<sub>2</sub>-PU composite photonic crystal film.

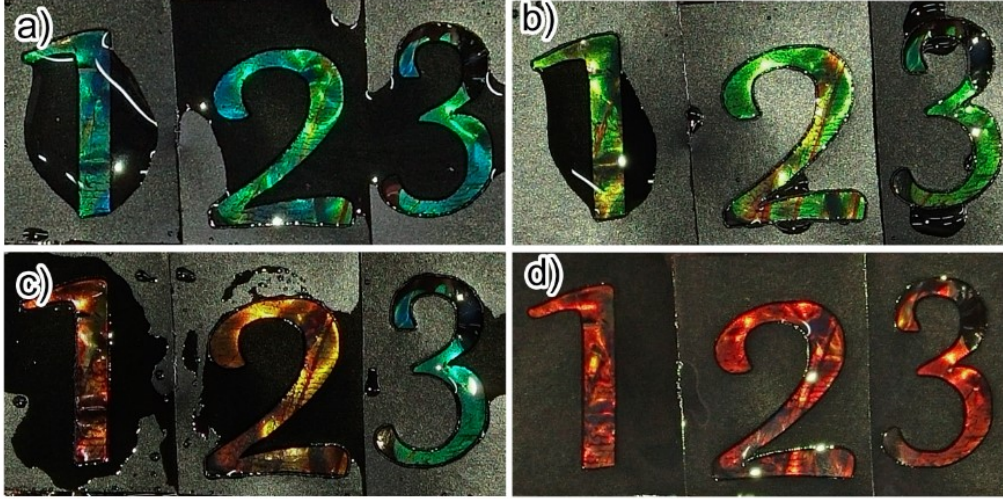

**Figure S2.** Digital photonic of the colored pattern on the PU-IPC film prepared by loading solvent with different ethanol concentration.

#### Calculation of the reflection wavelength of PU-IPC films in different solvents.

The diameter of SiO<sub>2</sub> colloid particle was measured to be 260 nm according to the SEM images. Based on the Bragg's law, the stop-band of the SiO<sub>2</sub> and SiO<sub>2</sub>-PU photonic crystal film could be calculated by Eq (1), where  $D$  is the diameter of the SiO<sub>2</sub> particle,  $f$  is the volume ratio of the SiO<sub>2</sub> particle (which is 74 % in a close-packed face centered cubic structure),  $n_{particle}$  and  $n_{voids}$  is the effective refractive index related to the composition of particle and interparticle voids.

$$\lambda = \left(\frac{8}{3}\right)^{1/2} \times D \times [n_{particle}^2 \times f_{particle} + n_{voids}^2 \times (1 - f_{particle})]^{1/2} \quad (1)$$

When SiO<sub>2</sub> was dissolved, the particle position was instead by air or other solvent, The reflection wavelength of SiO<sub>2</sub> photonic crystal films, SiO<sub>2</sub>-PU photonic crystal films and PU-IPC film were calculated and listed in Table S1.

Here, PU-IPC<sub>-water</sub> and PU-IPC<sub>-ethanol</sub> represents the calculated reflection wavelength when the interparticle voids of PU-IPC film being filled with water or ethanol.

**Table S1.** Reflection wavelength of SiO<sub>2</sub>, SiO<sub>2</sub>-PU photonic crystal films and PU-IPC film in different solvents.

| Composition                | n <sub>SiO2</sub> | n <sub>PU</sub> | n <sub>ethanol</sub> | n <sub>air</sub> | n <sub>water</sub> | λ(nm) |
|----------------------------|-------------------|-----------------|----------------------|------------------|--------------------|-------|
| SiO <sub>2</sub> -PC       | 1.46              | 1.44            | 1.36                 | 1                | 1.33               | 575   |
| SiO <sub>2</sub> -PU-PC    | 1.46              | 1.44            | 1.36                 | 1                | 1.33               | 620   |
| PU-IPC                     | 1.46              | 1.44            | 1.36                 | 1                | 1.33               | 480   |
| PU-IPC- <sub>Water</sub>   | 1.46              | 1.44            | 1.36                 | 1                | 1.33               | 577   |
| PU-IPC- <sub>ethanol</sub> | 1.46              | 1.44            | 1.36                 | 1                | 1.33               | 586   |
